# Supplementary material for: Exploring Differentially Expressed Genes by RNA-Seq in Cashmere Goat (Capra hircus) Skin during Hair Follicle Development and Cycling
Source: PLoS One. 2013 Apr 30;8(4):e62704. doi: 10.1371/journal.pone.0062704 (PMC3640091; doi:10.1371/journal.pone.0062704)
Supplement: Table S2 — Differentially expressed genes between anagen and telogen. (XLS) [file pone.0062704.s002.xls]

## Sheet: Table 3
Table S2 Differentially expressed genes between anagen and telogen
GeneID	telogen-Expression	anagen-Expression	telogen-RPKM	anagen-RPKM	log2 Ratio(anagen/telogen)	P-value	FDR
NM_001075378	2	36	0.550694	8.68551	3.97929	2.65508e-08	3.7544e-07
NM_001099718	2	30	0.560057	7.36098	3.71625	8.3457e-07	9.22176e-06
NR_001464	30	440	0.476535	6.12404	3.68383	1.79934e-83	3.9249e-81
NM_001192167	6	70	0.736747	7.53143	3.35368	2.14484e-13	5.52824e-12
NM_001205333	21	198	0.852127	7.03983	3.0464	1.21076e-32	1.04099e-30
NM_174326	4	26	0.870527	4.95801	2.5098	0.000148186	0.0009895
NM_173959	779	4956	55.2616	308.056	2.47884	0	0
NM_001103173	10	62	0.438529	2.38233	2.44163	4.5072e-09	7.09763e-08
NM_001193224	5	29	1.14888	5.83868	2.34541	0.000110794	0.000764527
NM_001192852	26	140	2.09222	9.87131	2.2382	3.667e-17	1.3209e-15
NM_001076936	26	139	5.28988	24.7799	2.22786	5.81952e-17	2.07094e-15
NM_001193102	8	38	0.445909	1.85589	2.05729	4.00628e-05	0.000305833
NM_001206198	8	37	0.906459	3.67343	2.01881	6.2801e-05	0.000459461
NM_001078042	285	1286	28.7825	113.799	1.98322	1.12777e-124	4.15124e-122
NM_001046597	74	328	9.35931	36.3494	1.95746	1.64399e-32	1.40323e-30
NM_001080309	51	224	14.032	54.0021	1.94429	1.70095e-22	8.9845e-21
NM_001105386	15	65	5.54063	21.0374	1.92484	2.185e-07	2.65331e-06
NM_001192310	10	42	1.90915	7.0259	1.87975	4.54852e-05	0.000342783
NM_174552	12	50	1.32408	4.8341	1.86826	8.90214e-06	8.04745e-05
NM_001192240	21	85	2.75407	9.76757	1.82643	9.70792e-09	1.4604e-07
NM_001081619	16	64	2.97014	10.41	1.80936	8.1162e-07	8.97659e-06
NM_001077980	29	113	3.88192	13.2538	1.77156	8.62526e-11	1.69895e-09
NM_001192585	30	116	2.78808	9.44612	1.76045	5.85668e-11	1.18329e-09
NM_001191316	20	76	2.74409	9.13679	1.73536	1.68266e-07	2.09736e-06
NM_174044	995	3759	73.0588	241.843	1.72694	2.27834e-299	1.9169e-296
NM_001075796	33	124	6.42201	21.1442	1.71916	2.71852e-11	5.70792e-10
NM_001164861	15	55	2.18025	7.00469	1.68383	1.40462e-05	0.00012059
NM_001205667	28	102	3.41501	10.9005	1.67443	3.14746e-09	5.05094e-08
NM_174738	19	69	6.20251	19.7367	1.66996	1.24701e-06	1.33775e-05
NM_001035433	13	47	3.88346	12.3023	1.66351	7.1081e-05	0.000512401
NM_001076862	13	46	1.05431	3.26884	1.63248	0.000105798	0.000736089
NM_001205955	64	221	8.5512	25.8733	1.59726	2.67034e-17	9.73806e-16
NM_001100347	54	186	5.95655	17.9774	1.59363	9.60566e-15	2.87901e-13
NM_001075279	14	48	3.09141	9.28712	1.58697	0.000103071	0.000718809
NM_001192380	78	267	12.8181	38.446	1.58466	2.22976e-20	1.04224e-18
NM_001192302	28	95	7.76875	23.0956	1.57186	4.71552e-08	6.45112e-07
NM_001205510	75	254	15.3368	45.5112	1.56923	3.30756e-19	1.41672e-17
NM_001046393	63	213	15.5085	45.9431	1.56679	2.61412e-16	8.77257e-15
NM_001191149	128	432	39.1737	115.846	1.56425	1.86148e-31	1.55506e-29
NM_001193198	19	64	1.30468	3.85072	1.56143	8.7208e-06	7.91999e-05
NM_001024693	189	636	9.21742	27.178	1.56	2.27772e-45	2.79471e-43
NM_001192471	29	96	1.99399	5.78375	1.53634	6.651e-08	8.89241e-07
NM_001205953	20	66	2.55091	7.37601	1.53183	8.40662e-06	7.65236e-05
NM_001135792	34	112	6.51859	18.815	1.52925	5.92198e-09	9.1422e-08
NM_001038100	21	69	3.3013	9.50444	1.52557	5.5461e-06	5.20124e-05
NM_001076388	57	187	10.7631	30.9396	1.52337	5.68968e-14	1.55858e-12
NM_001046245	39	125	9.4718	26.6005	1.48974	1.60029e-09	2.67373e-08
NM_174574	71	226	8.02225	22.3747	1.47979	5.8818e-16	1.89294e-14
NM_001191283	17	54	1.81606	5.0546	1.47679	9.07662e-05	0.000639435
NM_001075257	36	114	8.60478	23.8756	1.47233	1.13236e-08	1.6841e-07
NM_174045	3080	9738	152.885	423.541	1.47006	0	0
NM_001191309	32	101	6.52895	18.0562	1.46757	8.43896e-08	1.10447e-06
NM_001205419	97	306	9.17958	25.3738	1.46684	7.87192e-21	3.80014e-19
NM_001076339	21	66	3.40317	9.37175	1.46144	1.68509e-05	0.000141171
NM_001193007	201	627	18.8152	51.4272	1.45063	2.18976e-40	2.34483e-38
NM_174682	35	108	5.99929	16.2206	1.43497	5.02674e-08	6.84508e-07
NM_001205592	29	89	6.91339	18.5907	1.42711	8.59636e-07	9.48983e-06
NM_001205915	178	542	5.51184	14.7058	1.41578	6.13714e-34	5.69208e-32
NM_001193083	32	97	8.865	23.5458	1.40927	3.53398e-07	4.15852e-06
NM_001114190	129	391	19.7566	52.4699	1.40916	9.22648e-25	5.48882e-23
NM_174309	43	129	7.69069	20.2162	1.39432	5.37336e-09	8.33897e-08
NM_001205893	217	650	29.45	77.2949	1.39211	2.09704e-39	2.20545e-37
NM_001192851	61	182	12.6019	32.9451	1.38642	4.80738e-12	1.08065e-10
NM_001192902	96	284	8.11058	21.0238	1.37415	9.00322e-18	3.432e-16
NM_001192047	62	182	12.6285	32.4821	1.36296	8.95848e-12	1.95411e-10
NM_174314	546	1600	316.555	812.809	1.36046	2.77496e-91	6.67066e-89
NM_001206104	139	406	14.2523	36.4761	1.35576	2.75266e-24	1.59722e-22
NM_001098952	34	99	6.28578	16.0372	1.35126	6.21926e-07	6.96356e-06
NM_001163274	152	441	11.1472	28.3382	1.34607	5.6009e-26	3.49063e-24
NM_001081612	23	66	5.00253	12.5782	1.33019	6.11314e-05	0.00044836
NM_001205728	23	66	1.68811	4.24453	1.33019	6.11314e-05	0.000448081
NM_001206020	21	60	2.94371	7.36952	1.32393	0.000142106	0.00095595
NM_001110001	34	97	5.74633	14.3647	1.32181	1.2305e-06	1.32245e-05
NM_001192695	67	191	8.05238	20.1138	1.3207	8.85724e-12	1.93921e-10
NM_001046155	45	128	8.93973	22.281	1.31751	2.593e-08	3.67987e-07
NM_175051	165	467	10.0961	25.0379	1.31032	2.2452e-26	1.46112e-24
NM_001205430	23	65	3.68444	9.12367	1.30817	8.6109e-05	0.000611379
NM_001205952	236	665	12.1008	29.8769	1.30393	1.30275e-36	1.2895e-34
NM_001206180	43	121	9.66585	23.8325	1.30196	8.23834e-08	1.08062e-06
NM_001113233	26	73	6.12169	15.0603	1.29875	3.4333e-05	0.000266058
NM_001206309	31	87	3.467	8.52556	1.29811	5.98286e-06	5.57974e-05
NM_001206160	55	154	4.45255	10.9239	1.29479	1.64025e-09	2.73274e-08
NM_001102241	85	238	7.71745	18.9341	1.29479	6.05104e-14	1.65372e-12
NM_001206068	44	123	4.72266	11.5678	1.29244	7.61962e-08	1.00731e-06
NM_001144078	39	109	4.40384	10.7846	1.29214	4.27e-07	4.9407e-06
NM_001192675	53	148	3.2169	7.87111	1.29089	3.71074e-09	5.88275e-08
NM_001015517	106	295	12.6265	30.7901	1.28601	8.93626e-17	3.1421e-15
NM_001102247	27	75	2.93891	7.15313	1.28329	3.164e-05	0.000248128
NM_001205735	34	94	6.02157	14.5872	1.27649	3.36164e-06	3.28877e-05
NM_001037591	25	69	3.7341	9.0304	1.27403	7.30234e-05	0.000524797
NM_001193020	33	91	3.96741	9.58621	1.27276	5.08428e-06	4.81026e-05
NM_174224	116	319	5.69481	13.7222	1.26879	1.11569e-17	4.17199e-16
NM_001144853	232	637	25.6145	61.6239	1.26653	1.14818e-33	1.0484e-31
NM_001076925	134	367	11.2842	27.0797	1.26291	5.58294e-20	2.49096e-18
NM_001099378	164	449	21.6727	51.9909	1.26238	4.37178e-24	2.49977e-22
NM_174298	71	194	12.2804	29.4013	1.25953	3.35336e-11	6.94187e-10
NM_174223	48	131	3.78688	9.05573	1.25782	5.50724e-08	7.46488e-07
NM_001205528	32	87	4.07572	9.70925	1.2523	1.0691e-05	9.47547e-05
NM_001193026	35	95	5.6593	13.4595	1.24993	4.29316e-06	4.12473e-05
NM_001143875	90	244	15.7091	37.3174	1.24825	1.48427e-13	3.88516e-12
NM_001192122	34	92	9.3618	22.1963	1.24546	6.48568e-06	6.02008e-05
NM_174598	71	192	7.20856	17.0806	1.24458	6.3794e-11	1.28012e-09
NM_001178103	815	2200	103.476	244.747	1.24199	1.05687e-108	3.36455e-106
NM_001075169	104	280	13.7387	32.4101	1.2382	3.61252e-15	1.12274e-13
NM_001075849	443	1189	50.0231	117.642	1.23373	5.50694e-59	8.21092e-57
NM_173972	44	118	3.37862	7.93927	1.23257	3.8997e-07	4.56153e-06
NM_001105256	37	99	5.56316	13.0427	1.22926	3.60532e-06	3.50967e-05
NM_177499	27	72	4.01792	9.3882	1.2244	8.51412e-05	0.000605969
NM_001038671	27	72	3.49042	8.15564	1.2244	8.51412e-05	0.000605603
NM_001205886	119	317	10.6156	24.7781	1.22288	1.11079e-16	3.88251e-15
NM_001083737	49	130	8.99923	20.9202	1.21702	1.32508e-07	1.68554e-06
NM_001075836	401	1061	33.5191	77.7096	1.21311	1.71744e-51	2.29883e-49
NM_001206200	68	179	4.58765	10.5815	1.20571	7.6029e-10	1.33068e-08
NM_001012669	842	2212	37.0948	85.3882	1.20282	5.10152e-104	1.50227e-101
NM_001102289	67	176	7.12589	16.4017	1.2027	1.13718e-09	1.94975e-08
NM_001205832	115	302	31.3081	72.0406	1.20228	1.39953e-15	4.44342e-14
NM_001075593	78	204	17.7537	40.6851	1.19638	6.51908e-11	1.30371e-09
NM_173882	153	400	40.1744	92.03	1.19583	5.38512e-20	2.41184e-18
NM_001206755	70	183	4.44922	10.1917	1.19578	6.35404e-10	1.1221e-08
NM_001075759	31	81	12.6784	29.0268	1.19502	4.2607e-05	0.000323368
NM_001192510	103	269	8.70197	19.9134	1.19432	6.61284e-14	1.79476e-12
NM_174038	54	141	6.405	14.654	1.19403	6.1592e-08	8.26301e-07
NM_001192888	289	754	15.6604	35.8005	1.19286	3.71978e-36	3.65127e-34
NM_001101837	28	73	1.81828	4.15372	1.19183	0.000107032	0.000742914
NM_001206129	89	232	3.39043	7.74399	1.19161	3.76486e-12	8.54456e-11
NM_173995	53	138	4.27441	9.75195	1.18997	9.22778e-08	1.20104e-06
NM_001199074	75	195	8.16364	18.5981	1.18787	2.16972e-10	4.05669e-09
NM_001205671	65	169	7.47483	17.0289	1.18787	3.4727e-09	5.54267e-08
NM_174020	209	543	6.24856	14.2248	1.18681	2.71928e-26	1.73137e-24
NM_174782	94	244	8.29556	18.8677	1.18551	1.29163e-12	3.07355e-11
NM_001098937	145	372	17.9507	40.3523	1.16861	4.35096e-18	1.70833e-16
NM_001193231	96	246	10.638	23.8856	1.16691	1.9836e-12	4.65435e-11
NM_001040525	36	92	5.91603	13.2473	1.163	1.92828e-05	0.000159503
NM_001105502	33	84	10.1251	22.5828	1.15728	4.81432e-05	0.000361427
NM_001099164	35	89	7.08519	15.7865	1.15581	2.90008e-05	0.000230034
NM_001205851	50	127	5.7444	12.7847	1.15419	5.7488e-07	6.47992e-06
NM_001192412	227	576	12.6917	28.2182	1.15274	1.30335e-26	8.72284e-25
NM_001191540	54	137	4.80887	10.6901	1.15251	2.12128e-07	2.58393e-06
NM_001191342	34	86	5.54961	12.2997	1.14816	4.36186e-05	0.000330407
NM_001205360	53	134	2.94148	6.51638	1.14753	3.16956e-07	3.75974e-06
NM_001166526	198	500	24.7659	54.7987	1.14579	4.23464e-23	2.29861e-21
NM_001046263	43	108	7.72501	17.0007	1.13798	5.24548e-06	4.94688e-05
NM_001014912	75	188	17.421	38.2632	1.13513	1.83274e-09	3.03627e-08
NM_001077970	714	1788	80.0009	175.54	1.13371	4.95786e-77	1.00687e-74
NM_001123033	335	838	14.5133	31.8111	1.13215	6.01576e-37	6.05638e-35
NM_001206233	187	466	20.2876	44.2984	1.12665	4.21534e-21	2.06885e-19
NM_001035315	37	92	10.3212	22.4868	1.12347	3.22876e-05	0.000252199
NM_001076070	401	992	61.0013	132.227	1.1161	1.74652e-42	1.94078e-40
NM_001206018	87	215	8.50649	18.4197	1.11461	2.3203e-10	4.30407e-09
NM_001205833	66	163	12.7686	27.6311	1.1137	3.58238e-08	4.97604e-07
NM_001135578	32	79	2.56026	5.53826	1.11314	0.0001339	0.000904365
NM_001102259	109	269	6.93415	14.9945	1.11264	1.40096e-12	3.30699e-11
NM_001192532	77	190	21.1856	45.8054	1.11243	2.73162e-09	4.43192e-08
NM_174765	61	150	9.36204	20.1718	1.10744	1.43756e-07	1.8149e-06
NM_001206595	1493	3670	144.613	311.478	1.10693	2.57522e-150	1.16667e-147
NM_001075463	46	113	6.51619	14.0258	1.10598	5.24542e-06	4.95079e-05
NM_001103324	174	427	15.1272	32.5274	1.10451	6.67574e-19	2.76879e-17
NM_001205431	53	130	2.8897	6.21057	1.10381	1.05489e-06	1.14521e-05
NM_001105362	42	103	2.53017	5.43689	1.10354	1.43452e-05	0.000122532
NM_001101219	192	470	18.3182	39.2909	1.10092	1.4947e-20	7.04242e-19
NM_174838	38	93	3.8527	8.26184	1.10059	3.93968e-05	0.000301139
NM_001024548	925	2261	121.53	260.288	1.0988	2.9064e-92	7.28393e-90
NM_001001150	61	149	13.7718	29.4754	1.09779	1.93118e-07	2.37447e-06
NM_001205978	96	234	19.9234	42.552	1.09476	7.06936e-11	1.40897e-09
NM_176643	221	538	15.0811	32.1689	1.09292	4.77234e-23	2.5786e-21
NM_001035392	150	365	55.1253	117.534	1.0923	4.12268e-16	1.35268e-14
NM_001192967	70	170	9.35632	19.9099	1.08947	3.21346e-08	4.49541e-07
NM_001206707	34	82	6.25388	13.2159	1.07945	0.000146556	0.000980288
NM_001191525	85	205	6.20349	13.1094	1.07945	1.63436e-09	2.72678e-08
NM_001076234	51	123	6.36152	13.4434	1.07945	3.13398e-06	3.08655e-05
NM_001206047	74	178	6.90204	14.5471	1.07564	2.13438e-08	3.05108e-07
NM_177490	70	168	4.7607	10.0114	1.0724	5.74026e-08	7.75396e-07
NM_001205921	188	449	9.94208	20.8055	1.06534	9.18208e-19	3.79494e-17
NM_001098059	44	105	11.8277	24.7314	1.06418	2.09904e-05	0.000172057
NM_001206458	44	105	1.39686	2.92079	1.06418	2.09904e-05	0.000172177
NM_001101133	86	205	8.32782	17.394	1.06258	2.61762e-09	4.25282e-08
NM_001192936	337	803	24.7998	51.7781	1.06201	3.6688e-32	3.08677e-30
NM_001102167	285	679	21.954	45.8301	1.06181	1.94425e-27	1.35511e-25
NM_001100333	79	188	8.32399	17.357	1.06017	1.27281e-08	1.87875e-07
NM_001099034	111	264	9.98551	20.8096	1.05934	1.53632e-11	3.29023e-10
NM_001098974	88	209	13.5116	28.1179	1.05729	2.12754e-09	3.50004e-08
NM_001075758	48	114	5.84643	12.1665	1.05729	1.02717e-05	9.13826e-05
NM_001166499	48	114	4.83143	10.0543	1.05729	1.02717e-05	9.13137e-05
NM_001076416	54	128	8.82203	18.323	1.05447	3.05572e-06	3.02211e-05
NM_001077059	765	1810	122.711	254.396	1.05182	2.80036e-69	5.15398e-67
NM_174189	235	555	31.0781	64.3119	1.04919	2.61632e-22	1.37579e-20
NM_001192767	290	684	6.55012	13.5369	1.0473	4.71932e-27	3.25081e-25
NM_001191282	160	377	19.185	39.6091	1.04585	1.44505e-15	4.57561e-14
NM_001109998	121	285	10.4868	21.6428	1.04532	4.11738e-12	9.30876e-11
NM_001191453	65	153	4.58948	9.46571	1.04438	4.04876e-07	4.70783e-06
NM_001038036	51	120	13.8015	28.4544	1.04383	7.45794e-06	6.85235e-05
NM_001079579	102	240	23.1872	47.8048	1.04383	2.12172e-10	3.97958e-09
NM_001192975	173	407	12.2701	25.2934	1.04362	1.23614e-16	4.29512e-15
NM_001191367	66	155	15.4294	31.7504	1.04109	3.64134e-07	4.27205e-06
NM_001105634	82	192	8.14732	16.7153	1.03677	1.63627e-08	2.36486e-07
NM_001046071	126	295	48.5196	99.5362	1.03665	2.4448e-12	5.70244e-11
NM_001098866	85	199	14.3524	29.4423	1.0366	9.00454e-09	1.35806e-07
NM_001099142	68	159	8.24089	16.884	1.03478	2.94366e-07	3.50945e-06
NM_001192509	77	180	4.85243	9.93924	1.03443	4.86852e-08	6.6527e-07
NM_001192862	234	547	22.8487	46.7999	1.03439	1.52977e-21	7.603e-20
NM_001040541	321	750	135.095	276.571	1.03368	6.42822e-29	4.88503e-27
NM_001206110	272	634	40.6941	83.112	1.03024	1.44224e-24	8.53678e-23
NM_001077899	233	543	30.8812	63.0594	1.02998	2.94268e-21	1.45029e-19
NM_001191129	136	316	12.8168	26.0939	1.02568	6.49518e-13	1.58399e-11
NM_001076907	127	295	8.43463	17.1671	1.02525	3.8305e-12	8.67682e-11
NM_001205652	115	267	4.69851	9.5584	1.02457	4.09692e-11	8.42192e-10
NM_001099156	103	239	11.3893	23.1563	1.02373	4.40472e-10	7.94536e-09
NM_001206030	72	167	6.85129	13.9241	1.02314	1.91965e-07	2.36522e-06
NM_001192886	82	190	18.974	38.5221	1.02166	2.85878e-08	4.03276e-07
NM_001002763	828	1918	113.262	229.887	1.02126	6.06468e-70	1.1339e-67
NM_001192527	95	220	6.63785	13.4691	1.02087	2.36116e-09	3.84676e-08
NM_001206577	70	162	9.76327	19.7981	1.01993	3.14362e-07	3.73273e-06
NM_001101307	176	407	21.7661	44.1037	1.01881	4.73018e-16	1.5349e-14
NM_001191522	55	127	13.1549	26.6158	1.01669	6.42232e-06	5.96597e-05
NM_001101284	120	277	23.1908	46.9059	1.01621	2.41284e-11	5.09334e-10
NM_001076847	85	196	8.76504	17.7094	1.01468	2.07362e-08	2.97143e-07
NM_001099107	89	205	12.02	24.2595	1.01311	1.02524e-08	1.53448e-07
NM_001101191	53	122	5.40527	10.9022	1.01218	1.05641e-05	9.37715e-05
NM_001192992	332	763	8.05184	16.2141	1.00986	2.3701e-28	1.734e-26
NM_001206077	301	690	24.3241	48.8576	1.00619	1.19671e-25	7.3417e-24
NM_001205897	86	197	5.20158	10.4404	1.00515	2.4514e-08	3.48732e-07
NM_001076922	189	432	29.4561	58.9942	1.00201	1.57058e-16	5.34679e-15
NM_001206582	284	649	6.35204	12.719	1.00169	4.72182e-24	2.67396e-22
NM_001075647	193	0	101.502	0.001	-16.6311	1.4152e-64	2.41589e-62
NM_001001441	107	0	47.5732	0.001	-15.5379	3.8774e-36	3.77454e-34
NM_001192094	67	0	33.7193	0.001	-15.0413	6.53716e-23	3.50005e-21
NM_001079578	169	0	32.5736	0.001	-14.9914	1.22159e-56	1.73363e-54
NM_001206365	46	0	23.9833	0.001	-14.5497	5.74756e-16	1.8599e-14
NM_001024689	38	0	14.2838	0.001	-13.8021	2.54012e-13	6.47621e-12
NM_001077877	46	0	8.76824	0.001	-13.0981	5.74756e-16	1.85481e-14
NM_173881	26	0	8.5648	0.001	-13.0642	2.35998e-09	3.85017e-08
NM_001110773	99	0	8.1327	0.001	-12.9895	1.7136e-33	1.5408e-31
NM_001075335	29	0	4.70383	0.001	-12.1996	2.40378e-10	4.44492e-09
NM_174119	16	0	3.85999	0.001	-11.9144	4.78212e-06	4.54629e-05
NM_174117	23	0	1.39205	0.001	-10.443	2.31698e-08	3.30408e-07
NM_001205440	13	0	1.25751	0.001	-10.2964	4.69498e-05	0.000353368
NM_001038140	13	0	0.955893	0.001	-9.90071	4.69498e-05	0.000353143
NM_174773	189	1	40.05	0.185675	-7.75288	3.04258e-61	4.77847e-59
NM_001076373	132	1	67.9419	0.450999	-7.23503	1.50804e-42	1.69174e-40
NM_001075767	94	1	9.68759	0.0903025	-6.74523	3.9829e-30	3.1699e-28
NM_174225	603	7	147.139	1.49665	-6.6193	2.83102e-186	1.85259e-183
NM_001075195	60	1	21.0673	0.307658	-6.09753	4.52158e-19	1.90895e-17
NM_001075911	371	8	52.4929	0.991811	-5.72591	1.29967e-109	4.25245e-107
NM_174466	41	1	21.2238	0.453577	-5.54819	6.05042e-13	1.48475e-11
NM_001077027	39	1	17.9112	0.402413	-5.47604	2.64768e-12	6.16344e-11
NM_001037464	38	1	7.43497	0.171438	-5.43857	5.53402e-12	1.23457e-10
NM_001166227	401	11	23.8361	0.572923	-5.37867	3.10132e-115	1.07442e-112
NM_001206174	32	1	1.92327	0.0526627	-5.19064	4.5512e-10	8.18452e-09
NM_001035416	23	1	4.68741	0.178573	-4.7142	3.1955e-07	3.7867e-06
NM_001098072	40	2	2.61488	0.11456	-4.51257	1.48163e-11	3.18469e-10
NM_001075764	19	1	3.89631	0.179685	-4.43857	5.6793e-06	5.32192e-05
NM_001102248	1602	95	177.576	9.22693	-4.26644	0	0
NM_174397	16	1	4.15309	0.227438	-4.19064	4.81118e-05	0.000361421
NM_001007813	27	2	10.7631	0.698578	-3.94553	1.44665e-07	1.82442e-06
NM_001014915	54	4	19.7251	1.28026	-3.94553	5.0897e-14	1.40731e-12
NM_001034635	53	4	6.53673	0.432272	-3.91856	1.01714e-13	2.71061e-12
NM_001083800	261	21	101.15	7.1311	-3.82623	2.54936e-61	4.05796e-59
NM_001024537	24	2	15.1508	1.10628	-3.7756	1.154e-06	1.24251e-05
NM_001046590	22	2	4.40434	0.350833	-3.65007	4.54766e-06	4.34091e-05
NM_001046021	32	3	11.5723	0.950609	-3.60568	2.86198e-08	4.03245e-07
NM_001206640	21	2	3.58262	0.298968	-3.58296	8.98706e-06	8.09936e-05
NM_001034394	20	2	3.81428	0.334214	-3.51257	1.77008e-05	0.000147453
NM_001205186	99	10	21.1144	1.86877	-3.49807	1.62639e-22	8.6294e-21
NM_001046193	478	49	86.1296	7.73629	-3.4768	1.53412e-102	4.4074e-100
NM_173910	52	6	8.90059	0.899868	-3.30612	6.80974e-12	1.51343e-10
NM_001075662	17	2	3.92611	0.404721	-3.2781	0.000132146	0.000893542
NM_182786	3869	476	657.579	70.8873	-3.21357	0	0
NM_001076208	137	17	17.1834	1.86831	-3.20121	2.29424e-28	1.68899e-26
NM_001099162	24	3	4.27981	0.468755	-3.19064	5.9461e-06	5.55425e-05
NM_001046513	40	5	13.7647	1.50761	-3.19064	3.6365e-09	5.78842e-08
NM_001040530	40	5	22.6827	2.48438	-3.19064	3.6365e-09	5.78061e-08
NM_001083486	374	49	64.534	7.40842	-3.12282	4.61814e-73	8.91755e-71
NM_001193040	22	3	4.39948	0.525668	-3.06511	2.18248e-05	0.0001784
NM_174744	71	10	10.9478	1.35108	-3.01846	1.39572e-14	4.11005e-13
NM_001083769	21	3	3.4108	0.426943	-2.99799	4.15426e-05	0.000315901
NM_001206371	24	4	4.01133	0.5858	-2.7756	2.3825e-05	0.000192611
NM_001034668	169	30	50.736	7.89155	-2.68463	3.73952e-29	2.86025e-27
NM_001101872	100	18	13.3073	2.09881	-2.66457	1.0513e-17	3.95632e-16
NM_001076167	22	4	3.19129	0.508412	-2.65007	8.16798e-05	0.000582742
NM_174137	104	19	12.6886	2.03117	-2.64315	3.31332e-18	1.30965e-16
NM_001034702	60	11	14.9426	2.40037	-2.6381	4.74472e-11	9.71966e-10
NM_001191311	80	15	16.0246	2.6327	-2.60568	4.06214e-14	1.13116e-12
NM_001075243	79	15	13.7164	2.28201	-2.58753	7.35576e-14	1.9918e-12
NM_001034039	58621	11169	4470.06	746.254	-2.58256	0	0
NM_001034669	25	5	3.40561	0.596811	-2.51257	4.3745e-05	0.000331152
NM_001184950	52	11	27.1898	5.03974	-2.43165	5.29656e-09	8.2415e-08
NM_174384	66	14	6.62848	1.232	-2.42768	4.63072e-11	9.50266e-10
NM_001199063	175	38	48.0397	9.14025	-2.39392	1.33948e-26	8.914e-25
NM_001101180	71	16	6.5464	1.29264	-2.34039	2.35352e-11	4.97704e-10
NM_001078150	92	21	16.9308	3.38627	-2.32188	3.44108e-14	9.67362e-13
NM_001099204	30	7	13.0815	2.67452	-2.29017	2.12324e-05	0.000173799
NM_175773	34	8	9.24241	1.9055	-2.2781	6.21268e-06	5.78491e-05
NM_001101150	46	11	19.0714	3.99604	-2.25477	1.60426e-07	2.01671e-06
NM_001192731	25	6	3.85322	0.810303	-2.24953	0.00012904	0.00087505
NM_001101297	33	8	22.9957	4.88467	-2.23503	1.08971e-05	9.62194e-05
NM_001083377	37	9	6.25628	1.33343	-2.23017	3.19938e-06	3.1457e-05
NM_001205143	37	9	10.258	2.18633	-2.23017	3.19938e-06	3.14308e-05
NM_001038556	45	11	11.7989	2.52716	-2.22306	2.79762e-07	3.3455e-06
NM_001034340	572	141	102.456	22.1295	-2.21096	1.12281e-75	2.24163e-73
NM_001205995	28	7	10.1663	2.22698	-2.19064	6.53302e-05	0.000474137
NM_001191145	143	36	35.2977	7.78619	-2.18058	8.70398e-20	3.83986e-18
NM_001034220	46	12	19.4952	4.45619	-2.12924	4.29796e-07	4.96817e-06
NM_001098054	49	13	12.5392	2.91493	-2.10491	2.1943e-07	2.66186e-06
NR_037684	64	17	11.8684	2.76231	-2.10318	3.01838e-09	4.86368e-08
NM_001075588	124	33	71.5482	16.6841	-2.10044	1.30337e-16	4.50217e-15
NM_001166485	709	189	46.5503	10.873	-2.09804	1.9401e-87	4.48087e-85
NM_001083748	63	17	16.2019	3.83077	-2.08046	5.14506e-09	8.01636e-08
NM_001101087	47	13	10.3468	2.50762	-2.04479	6.3804e-07	7.12367e-06
NM_174520	33409	9365	2615.81	642.485	-2.02552	0	0
NM_001105651	89	25	22.3957	5.51221	-2.02252	8.50354e-12	1.87221e-10
NM_001040498	56	16	14.1803	3.55	-1.99799	8.30132e-08	1.08767e-06
NM_001075325	31	9	10.6576	2.71113	-1.97491	8.27694e-05	0.000589444
NM_173985	31	9	16.3747	4.1655	-1.97491	8.27694e-05	0.000589801
NM_001046020	161	47	62.7981	16.0632	-1.96697	1.63323e-19	7.0468e-18
NM_174603	214	63	18.9549	4.88945	-1.95483	3.05626e-25	1.83672e-23
NM_001083435	44	13	7.72466	1.99978	-1.94963	3.06652e-06	3.03025e-05
NM_001045875	2275	677	382.18	99.6523	-1.93928	3.2291e-249	2.37722e-246
NM_001076027	238	71	60.9477	15.9313	-1.93571	1.492e-27	1.04608e-25
NM_001046011	33	10	8.63377	2.29244	-1.9131	6.91516e-05	0.000499409
NM_001191219	36	11	6.35714	1.70202	-1.90113	3.43572e-05	0.000266071
NM_001076460	36	11	9.67719	2.5909	-1.90113	3.43572e-05	0.000265896
NM_001191498	36	11	3.35688	0.898749	-1.90113	3.43572e-05	0.000265721
NM_174359	49	15	12.0376	3.22885	-1.89846	1.28927e-06	1.37557e-05
NM_001191202	39	12	8.26912	2.2294	-1.89108	1.71099e-05	0.000142934
NM_174140	575	180	147.98	40.5899	-1.8662	3.3408e-61	5.1778e-59
NM_001045977	51	16	12.2548	3.36874	-1.86306	1.07176e-06	1.16138e-05
NM_174146	57	18	8.24854	2.28237	-1.8536	2.70516e-07	3.24151e-06
NM_001076831	24755	8001	1646.5	466.29	-1.82011	0	0
NM_001046212	673	221	272.781	78.488	-1.7972	8.38958e-68	1.52032e-65
NM_001101113	78	26	22.9042	6.6897	-1.7756	4.9167e-09	7.69108e-08
NM_001205635	178	60	92.274	27.2535	-1.75948	1.32924e-18	5.34372e-17
NM_001046157	44	15	11.9161	3.55946	-1.74318	1.54227e-05	0.000130976
NM_001046392	41	14	5.38089	1.60994	-1.74084	3.09592e-05	0.000243437
NM_001046001	35	12	8.02689	2.41142	-1.73496	0.000125664	0.000854619
NM_001076517	67	23	33.7662	10.1566	-1.73317	9.99982e-08	1.30009e-06
NM_001045966	101	35	9.86736	2.99612	-1.71957	7.2658e-11	1.44324e-09
NM_001034735	1154	401	304.559	92.7305	-1.71561	8.59206e-108	2.66331e-105
NM_001034360	100	35	85.0603	26.086	-1.70521	1.16295e-10	2.24932e-09
NM_001205741	40	14	3.65003	1.11938	-1.70521	5.01506e-05	0.000374113
NM_001024481	99	35	15.8732	4.91709	-1.69071	1.85686e-10	3.50512e-09
NM_175717	79	28	19.9625	6.19951	-1.68706	1.35424e-08	1.98897e-07
NM_001205747	199	71	26.9667	8.43035	-1.67752	2.25396e-19	9.68956e-18
NM_001099007	56	20	10.8397	3.39213	-1.67607	2.02524e-06	2.08161e-05
NM_174493	1170	419	290.78	91.2442	-1.67213	2.1481e-105	6.48781e-103
NM_174821	268	96	60.468	18.979	-1.67177	1.93782e-25	1.17658e-23
NM_001193296	106	38	35.5647	11.1714	-1.67063	6.16788e-11	1.24191e-09
NM_174202	89	32	29.9163	9.42497	-1.66637	2.26244e-09	3.70644e-08
NM_001077827	1373	495	249.007	78.6608	-1.66247	2.4139e-122	8.61616e-120
NM_001078038	47	17	11.2712	3.57218	-1.65776	1.60676e-05	0.000135671
NM_001035301	299	109	69.8097	22.2989	-1.64646	1.27212e-27	9.02666e-26
NM_001040526	41	15	6.02703	1.93207	-1.6413	6.44196e-05	0.000468683
NM_001075426	98	36	13.7853	4.43716	-1.63542	5.98424e-10	1.05998e-08
NM_174521	95	35	21.8564	7.05563	-1.63121	1.17686e-09	2.01487e-08
NM_001046260	219	81	50.0039	16.2053	-1.62558	2.67024e-20	1.23344e-18
NM_001045888	756	281	173.052	56.3604	-1.61845	1.13817e-65	2.00096e-63
NM_001076374	72	27	24.8001	8.14886	-1.60568	1.6942e-07	2.10951e-06
NM_001046518	135	51	27.9213	9.2424	-1.59503	9.19744e-13	2.22001e-11
NM_001078026	156	59	9.05457	3.00059	-1.5934	1.66476e-14	4.82984e-13
NM_001163171	124	47	60.4741	20.0843	-1.59025	8.58502e-12	1.88311e-10
NM_001075656	2095	795	411.011	136.662	-1.58856	6.48246e-174	3.81784e-171
NM_001098932	50	19	6.02122	2.00484	-1.58657	1.61648e-05	0.000136296
NM_173891	244	93	104.263	34.8206	-1.58222	1.22972e-21	6.19013e-20
NM_001103221	724	280	118.174	40.0455	-1.5612	7.93128e-60	1.19772e-57
NM_001076220	62	24	10.4397	3.54093	-1.55987	2.0487e-06	2.10206e-05
NM_174841	757	294	27.956	9.51346	-1.55512	3.99466e-62	6.53515e-60
NM_174631	139	54	10.9973	3.74349	-1.55469	1.13707e-12	2.72226e-11
NM_001034774	95	37	32.8786	11.2203	-1.55104	4.52148e-09	7.11062e-08
NM_001076868	59	23	14.6834	5.01551	-1.54972	4.04758e-06	3.90791e-05
NM_001100330	100	39	33.4278	11.4231	-1.54909	1.83633e-09	3.03794e-08
NM_173991	271	107	85.0942	29.4392	-1.53132	8.19794e-23	4.36939e-21
NM_001193140	53	21	2.44992	0.850564	-1.52624	1.58235e-05	0.000133801
NM_001046452	1084	431	184.411	64.246	-1.52124	2.0803e-85	4.62337e-83
NM_001046063	1433	571	242.644	84.7171	-1.51811	5.8026e-112	1.95282e-109
NM_001098991	55	22	9.07956	3.18227	-1.51257	1.24605e-05	0.000108479
NM_001046256	57	23	10.9747	3.88022	-1.49997	9.80314e-06	8.76109e-05
NM_174388	74	30	26.7342	9.49662	-1.4932	4.9788e-07	5.67718e-06
NM_001075126	1730	714	173.795	62.8493	-1.46741	3.44666e-128	1.39994e-125
NM_001192664	150	62	18.8335	6.82094	-1.46526	1.53145e-12	3.60779e-11
NM_001083401	227	94	73.7713	26.7671	-1.4626	3.51794e-18	1.38588e-16
NM_001098465	53	22	14.4507	5.25589	-1.45913	2.98024e-05	0.000235283
NM_001102035	113	47	16.8573	6.14354	-1.45623	1.02596e-09	1.76937e-08
NM_001038688	170	71	67.4706	24.6909	-1.45028	7.89282e-14	2.12745e-12
NM_001032300	81	34	10.7159	3.94126	-1.44303	2.9223e-07	3.48751e-06
NM_001192455	453	191	89.8455	33.1928	-1.43658	7.92526e-34	7.2931e-32
NM_001101924	45	19	4.34712	1.60826	-1.43456	0.000147932	0.000988367
NM_001034339	118	50	25.6344	9.51749	-1.42943	7.61254e-10	1.33039e-08
NM_001013601	59	25	18.164	6.74392	-1.42943	1.42586e-05	0.00012197
NM_001040469	1817	777	128.444	48.1272	-1.41621	1.32932e-127	5.21935e-125
NM_001143865	2438	1047	217.111	81.6973	-1.41008	1.99058e-169	1.06577e-166
NM_001075746	67	29	12.2061	4.62926	-1.39875	5.31298e-06	4.99853e-05
NR_003958	97	42	16.9882	6.44521	-1.39823	4.1834e-08	5.77005e-07
NM_001205901	53	23	6.38249	2.42691	-1.395	5.44218e-05	0.00040266
NM_173965	92	40	9.18117	3.4977	-1.39227	1.02896e-07	1.33188e-06
NM_001034491	92	40	28.2516	10.7628	-1.39227	1.02896e-07	1.33042e-06
NM_001205773	62	27	9.32591	3.55857	-1.38995	1.32214e-05	0.000114091
NM_001205566	71	31	8.62755	3.30067	-1.38619	3.23962e-06	3.17731e-05
NM_001034407	421	184	66.3559	25.4113	-1.38475	6.27708e-30	4.92918e-28
NM_001145035	112	49	29.03	11.1285	-1.38328	5.03982e-09	7.86279e-08
NM_001034720	160	70	27.4643	10.5283	-1.38328	2.69998e-12	6.27279e-11
NM_001046403	218	96	29.5414	11.3988	-1.37386	4.5344e-16	1.47952e-14
NM_001040495	161	71	55.9343	21.6134	-1.37181	3.17374e-12	7.30146e-11
NM_001076049	197	87	34.369	13.2994	-1.36975	1.3252e-14	3.922e-13
NM_001038076	97	43	40.3081	15.6567	-1.36429	7.41112e-08	9.80849e-07
NM_001103253	787	349	153.155	59.5106	-1.36378	2.94056e-53	3.98125e-51
NM_001046532	54	24	8.73539	3.40182	-1.36056	6.41102e-05	0.000467588
NM_174386	162	72	64.7209	25.2043	-1.36056	3.7193e-12	8.45746e-11
NM_183082	85	38	27.0891	10.6114	-1.3521	5.71974e-07	6.45334e-06
NM_174471	654	293	293.294	115.134	-1.34903	7.68834e-44	8.96643e-42
NM_001192801	58	26	8.98918	3.53084	-1.34818	3.87056e-05	0.000296625
NM_001192178	58	26	5.7659	2.26477	-1.34818	3.87056e-05	0.000296433
NM_174727	58	26	3.54413	1.39209	-1.34818	3.87056e-05	0.000296819
NM_001105414	60	27	6.81763	2.68818	-1.34264	3.00788e-05	0.000237147
NM_001083532	560	253	89.6289	35.4807	-1.33693	2.7623e-37	2.80493e-35
NM_001105616	230	104	59.7863	23.6875	-1.33569	3.20364e-16	1.06298e-14
NM_001205948	95	43	9.80459	3.88854	-1.33423	1.65599e-07	2.0663e-06
NM_001075140	99	45	85.2098	33.9374	-1.32814	1.00865e-07	1.30991e-06
NM_001101883	252	115	23.9984	9.59603	-1.32243	2.21134e-17	8.11445e-16
NM_001046097	368	169	86.7582	34.9109	-1.31332	2.00796e-24	1.18259e-22
NM_001033608	400	184	246.921	99.5241	-1.31093	2.44322e-26	1.56406e-24
NM_001075332	100	46	17.0601	6.87625	-1.31093	1.16862e-07	1.49784e-06
NM_175772	191	88	21.348	8.61823	-1.30864	2.44216e-13	6.23996e-12
NM_001013582	67	31	29.2858	11.8729	-1.30253	1.63628e-05	0.000137768
NM_174019	67	31	14.8036	6.00159	-1.30253	1.63628e-05	0.000137867
NM_001101839	84	39	9.60189	3.9062	-1.29755	1.47232e-06	1.55399e-05
NM_174464	10496	4876	1776.41	723.095	-1.29671	0	0
NM_001010995	772	359	130.233	53.0651	-1.29526	2.1271e-48	2.6941e-46
NM_001038212	86	40	27.9988	11.4107	-1.29498	1.1459e-06	1.23491e-05
NM_001025349	215	100	142.686	58.1508	-1.29498	1.29349e-14	3.83779e-13
NM_174791	62	29	23.6984	9.71266	-1.28685	4.03624e-05	0.000307522
NM_001098906	100	47	30.1462	12.4149	-1.27991	1.98823e-07	2.43698e-06
NM_173935	100	47	44.8462	18.4686	-1.27991	1.98823e-07	2.43952e-06
NM_001034328	123	58	25.2092	10.4158	-1.27517	8.72802e-09	1.31973e-07
NM_001024562	89	42	33.6285	13.9053	-1.27405	1.02424e-06	1.11605e-05
NM_174030	705	333	109.64	45.3771	-1.27274	3.39648e-43	3.88419e-41
NM_001015642	313	148	48.0991	19.9281	-1.2712	4.80842e-20	2.16177e-18
NM_001098035	74	35	12.8792	5.33748	-1.27081	8.80812e-06	7.98083e-05
NM_001105324	95	45	21.1319	8.77082	-1.26864	4.82556e-07	5.51847e-06
NM_001206169	57	27	4.66449	1.936	-1.26864	9.96736e-05	0.000697597
NM_174181	78	37	9.91714	4.12198	-1.26659	5.3125e-06	5.00207e-05
NM_001192311	84	40	34.946	14.5811	-1.26103	2.49206e-06	2.51103e-05
NM_001098982	2639	1261	252.511	105.723	-1.25606	1.70058e-153	8.01245e-151
NM_001075374	71	34	14.7773	6.20053	-1.25292	1.67146e-05	0.000140129
NM_001035273	150	72	31.7115	13.3374	-1.24953	3.95212e-10	7.17288e-09
NM_176638	104	50	18.6283	7.84734	-1.24722	2.02016e-07	2.47097e-06
NM_001100324	79	38	16.4329	6.92602	-1.24649	6.06212e-06	5.64919e-05
NM_173888	81	39	17.9846	7.5874	-1.24509	4.70716e-06	4.47865e-05
NM_174623	2824	1361	2263.93	956.023	-1.24371	1.30943e-161	6.706e-159
NM_001038518	58	28	14.7176	6.22556	-1.24126	0.000113789	0.000781531
NM_001046515	93	45	37.5269	15.9105	-1.23794	1.03608e-06	1.12583e-05
NM_001206503	68	33	8.64571	3.67636	-1.23371	3.1645e-05	0.000248002
NM_001045936	70	34	9.72211	4.13765	-1.23246	2.4524e-05	0.000197991
NM_001034728	331	161	36.9843	15.7626	-1.23041	3.95016e-20	1.78957e-18
NM_001080923	82	40	21.9124	9.36589	-1.22626	5.34396e-06	5.02366e-05
NM_001012677	659	322	188.174	80.5643	-1.22386	3.62658e-38	3.71456e-36
NM_174641	126	62	14.5543	6.27517	-1.21372	2.12416e-08	3.04016e-07
NM_001034431	75	37	11.5646	4.99899	-1.21	1.6678e-05	0.000140022
NM_001012680	259	128	77.7551	33.6706	-1.20745	1.18056e-15	3.76851e-14
NM_174087	587	291	55.6233	24.1615	-1.20298	2.64016e-33	2.33823e-31
NM_001105489	137	68	34.4742	14.9932	-1.20121	6.87124e-09	1.05386e-07
NM_174556	693	344	103.169	44.8731	-1.20109	6.38046e-39	6.65092e-37
NM_001206692	88	44	24.4535	10.7133	-1.19064	4.09664e-06	3.9488e-05
NM_001205402	328	164	43.52	19.0665	-1.19064	5.0179e-19	2.10341e-17
NM_001105648	96	48	18.1462	7.95001	-1.19064	1.49135e-06	1.56984e-05
NM_174537	62	31	35.3241	15.4758	-1.19064	0.000112516	0.000774136
NM_001077837	104	52	8.58627	3.76172	-1.19064	5.44568e-07	6.19157e-06
NM_001015590	66	33	7.93219	3.47516	-1.19064	6.73412e-05	0.00048783
NM_001100354	72	36	9.21897	4.03891	-1.19064	3.12688e-05	0.00024538
NM_001034514	88	44	42.4599	18.6021	-1.19064	4.09664e-06	3.95203e-05
NM_001103224	230	116	33.2703	14.7028	-1.17815	1.3859e-13	3.65201e-12
NM_001046585	166	84	63.5848	28.1927	-1.17336	3.80906e-10	6.94534e-09
NM_001101884	81	41	16.4155	7.28056	-1.17294	1.26615e-05	0.000109904
NM_001102180	71	36	6.50831	2.89151	-1.17046	4.52578e-05	0.000341725
NM_001079507	71	36	12.5011	5.554	-1.17046	4.52578e-05	0.000341506
NM_001034272	176	90	62.5243	28.015	-1.15822	1.75626e-10	3.32588e-09
NM_001046118	244	125	38.0607	17.0848	-1.15559	6.24712e-14	1.70335e-12
NM_001025334	78	40	28.3205	12.7256	-1.15411	2.3509e-05	0.000190449
NM_181028	76	39	29.612	13.3147	-1.15316	3.03268e-05	0.000238623
NM_001035490	66	34	18.1591	8.19675	-1.14757	0.000108874	0.000753485
NM_001105393	165	85	32.6715	14.7474	-1.14757	8.65716e-10	1.50624e-08
NM_001040479	7733	3984	938.1	423.48	-1.14745	0	0
NM_174148	256	132	30.0984	13.5985	-1.14624	2.2513e-14	6.46782e-13
NM_001128505	343	177	56.0615	25.3487	-1.1451	1.0181e-18	4.19308e-17
NM_001130755	93	48	16.1395	7.29893	-1.14483	4.43516e-06	4.2404e-05
NM_001075716	131	68	16.4138	7.46551	-1.1366	5.96034e-08	8.01448e-07
NM_001206614	69	36	46.9974	21.4852	-1.12924	9.36014e-05	0.000657051
NM_001012287	90	47	19.1386	8.75743	-1.1279	8.15776e-06	7.44886e-05
NM_001102187	80	42	11.0055	5.0627	-1.12025	2.89666e-05	0.000229918
NM_174058	266	140	36.2903	16.7359	-1.11664	2.52526e-14	7.16748e-13
NM_001143743	197	104	42.8992	19.844	-1.11225	6.3521e-11	1.27682e-09
NM_001075197	396	210	80.5238	37.4162	-1.10575	2.77812e-20	1.27329e-18
NM_001040480	81	43	25.8598	12.0288	-1.10422	3.19798e-05	0.00024996
NM_001101061	285	152	24.2935	11.3528	-1.09753	7.3244e-15	2.21216e-13
NM_175797	103	55	33.5938	15.718	-1.09578	3.10822e-06	3.06631e-05
NM_001075830	262	140	41.8227	19.5817	-1.09478	9.87808e-14	2.63841e-12
NM_001075634	86	46	11.086	5.19572	-1.09334	2.12114e-05	0.000173748
NM_001113724	91	49	37.5136	17.6993	-1.08372	1.40601e-05	0.000120622
NM_001002885	453	244	272.671	128.689	-1.08327	2.84306e-22	1.48179e-20
NM_001033625	102	55	10.7412	5.07489	-1.0817	4.38622e-06	4.20043e-05
NM_001109794	187	101	54.252	25.6748	-1.07932	5.1972e-10	9.27543e-09
NM_001206192	216	117	29.8054	14.1462	-1.07516	2.78512e-11	5.82699e-10
NM_001194953	72	39	27.4918	13.0481	-1.07516	0.000125254	0.000852813
NM_001192969	72	39	9.18328	4.35855	-1.07516	0.000125254	0.000853306
NM_174029	2763	1500	1362.17	647.966	-1.07191	6.02866e-125	2.2907e-122
NM_001045901	81	44	26.7556	12.7349	-1.07106	4.9701e-05	0.000371229
NM_001075596	206	112	52.9777	25.238	-1.06978	9.5033e-11	1.86566e-09
NM_001075403	156	85	14.7131	7.02442	-1.06665	1.92209e-08	2.77114e-07
NM_001103230	194	106	28.3228	13.5598	-1.06263	4.1466e-10	7.51428e-09
NM_001046593	183	100	37.2535	17.8373	-1.06248	1.29872e-09	2.19793e-08
NM_001035353	267	146	47.1718	22.6014	-1.06151	2.36528e-13	6.06985e-12
NM_001077893	137	75	59.1691	28.3823	-1.05985	1.63158e-07	2.04017e-06
NM_001035105	80	44	15.9016	7.66328	-1.05314	6.99256e-05	0.000504381
NM_177506	98	54	17.0072	8.2113	-1.05046	1.11126e-05	9.79026e-05
NM_001077849	116	64	56.0445	27.0936	-1.04862	1.79109e-06	1.86371e-05
NM_001192434	96	53	9.41187	4.55295	-1.04768	1.42749e-05	0.000122021
NM_174726	248	137	25.5951	12.3891	-1.0468	2.95146e-12	6.83011e-11
NM_001037455	114	63	14.6641	7.10072	-1.04625	2.29688e-06	2.32431e-05
NM_001075395	103	57	28.6657	13.8999	-1.04425	7.33814e-06	6.74754e-05
NM_001012681	92	51	38.1428	18.5271	-1.04178	2.35638e-05	0.000190762
NM_001102101	174	97	19.4359	9.49379	-1.03367	7.2942e-09	1.11149e-07
NM_001077012	113	63	22.026	10.7599	-1.03354	3.20082e-06	3.14187e-05
NM_173946	487	272	81.4718	39.8712	-1.03095	4.3137e-22	2.21882e-20
NM_182788	204	114	55.206	27.0317	-1.03017	4.19724e-10	7.59436e-09
NM_001099080	93	52	11.0344	5.40609	-1.02936	2.55994e-05	0.000205266
NM_001206348	1401	785	198.151	97.2835	-1.02633	5.62852e-60	8.61017e-58
NM_001075768	91	51	11.043	5.42287	-1.02601	3.2877e-05	0.000256293
NM_173934	1586	892	315.595	155.526	-1.02092	4.40336e-67	7.85866e-65
NM_001083732	80	45	11.7744	5.80327	-1.02071	0.00010633	0.000738915
NM_174076	421	237	164.743	81.2617	-1.01957	5.4793e-19	2.28059e-17
NM_001098381	113	64	23.4649	11.6448	-1.01082	4.81094e-06	4.57001e-05
NM_001099722	195	111	81.3114	40.5557	-1.00355	2.28532e-09	3.73872e-08
